# Supplementary material for: Highly active Pd–Ni nanocatalysts supported on multicharged polymer matrix
Source: Royal Society of Chemistry journal article supplement (doi:10.1039/c7cy01797a), 2017-01-01
Supplement: c7cy01797a1.pdf [file c7cy01797a1.pdf]

## Electronic Supplementary Information (ESI)

### Highly active Pd-Ni nanocatalysts supported on multicharged polymer matrix

Elza D. Sultanova,<sup>ab</sup> Aida I. Samigullina,<sup>a</sup> Natalya V. Nastapova,<sup>a</sup> Irek R. Nizameev,<sup>ac</sup> Kirill V. Kholin,<sup>ad</sup> Vladimir I. Morozov,<sup>a</sup> Aidar T. Gubaidullin,<sup>a</sup> Vitaliy V. Yanilkin,<sup>a</sup> Marsil K. Kadirov,<sup>a</sup> Albina Y. Ziganshina\*<sup>ab</sup> and Alexander I. Konovalov<sup>ab</sup>

<sup>a</sup>A. E. Arbuzov Institute of Organic and Physical Chemistry, Russian Academy of Sciences, Arbuzov str. 8, Kazan 420088, Russia. E-mail: az@iopc.ru

<sup>b</sup>A. M. Butlerov Institute of Chemistry, Kazan Federal University, Kremlevskaya str. 18, Kazan 420018, Russia

<sup>c</sup>Kazan National Research Technical University, K. Marx str. 10, Kazan 420111, Russia

<sup>d</sup>Kazan National Research Technological University, Karl Marx str. 68, Kazan 420015, Russia

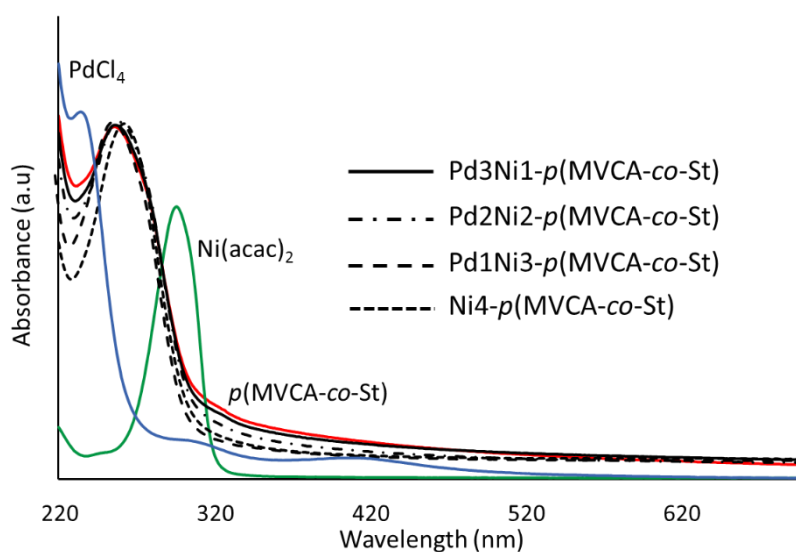

**Fig. S1.** UV spectra of Ni(acac)<sub>2</sub> (green); Na<sub>2</sub>[PdCl<sub>4</sub>] (blue); p(MVCA-co-St) (red); and Pd3Ni1-p(MVCA-co-St), Pd2Ni2-p(MVCA-co-St), Pd1Ni3-p(MVCA-co-St) and Ni4-p(MVCA-co-St) (H<sub>2</sub>O, 20 °C, l = 0.5 cm).

**Table S1.** Amount of Pd and Ni in the compositions measured by inductively coupled plasma atomic emission spectrometry (ICP-AES).<sup>a</sup>

|                      | Theoretical yield |              | ICP-AES data, yield      |                          | Molar ratio Pd-Ni measured by ICP-AES |      |
|----------------------|-------------------|--------------|--------------------------|--------------------------|---------------------------------------|------|
|                      | Pd, C (mg/l)      | Ni, C (mg/l) | Pd, C (mg/l), $\pm 10\%$ | Ni, C (mg/l), $\pm 10\%$ | Pd                                    | Ni   |
| Pd3Ni1-p(MVCA-co-St) | 2.3               | 0.42         | 1.78 (77%)               | 0.37 (88 %)              | 0.73                                  | 0.27 |
| Pd2Ni2-p(MVCA-co-St) | 1.52              | 0.84         | 1.31 (86 %)              | 0.62 (74 %)              | 0.54                                  | 0.46 |
| Pd1Ni3-p(MVCA-co-St) | 0.76              | 1.25         | 0.66 (87 %)              | 0.98 (78 %)              | 0.27                                  | 0.73 |
| Ni4-p(MVCA-co-St)    | -                 | 1.68         | -                        | 1.31 (78 %)              | -                                     | 1    |

<sup>a</sup>The samples solutions were diluted 70-fold before measurement

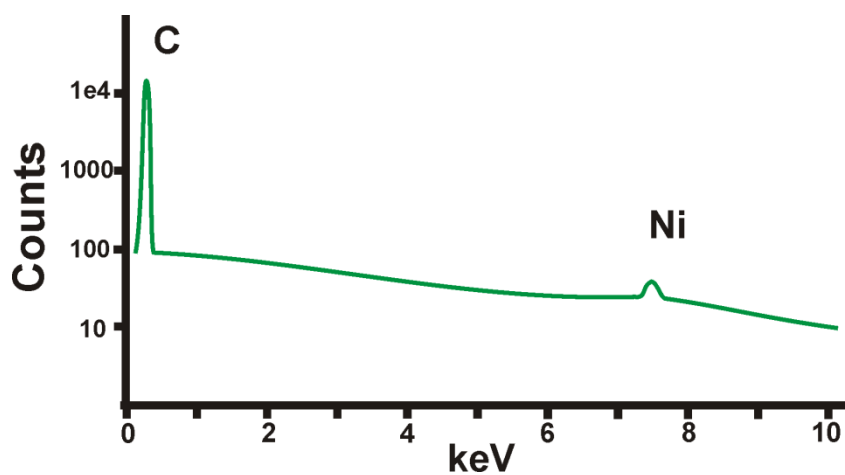

**Fig. S2.** EDX spectrum of Ni4-p(MVCA-co-St) after background subtraction.

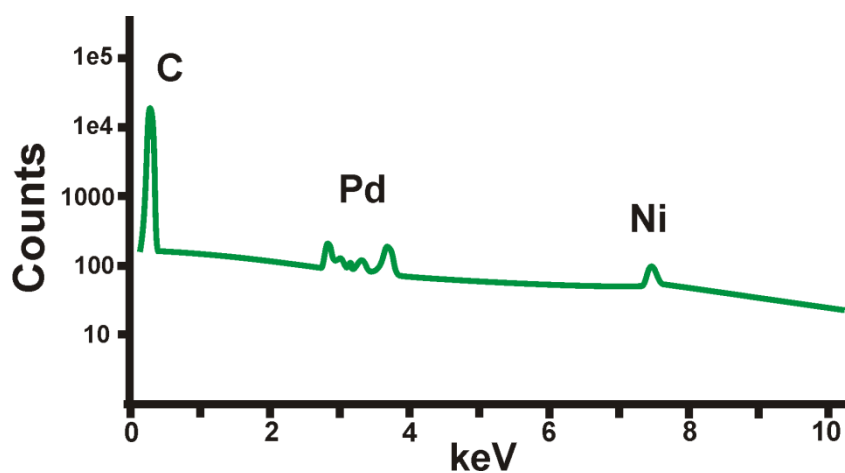

**Fig. S3.** EDX spectrum of Pd1Ni3-p(MVCA-co-St) after background subtraction.

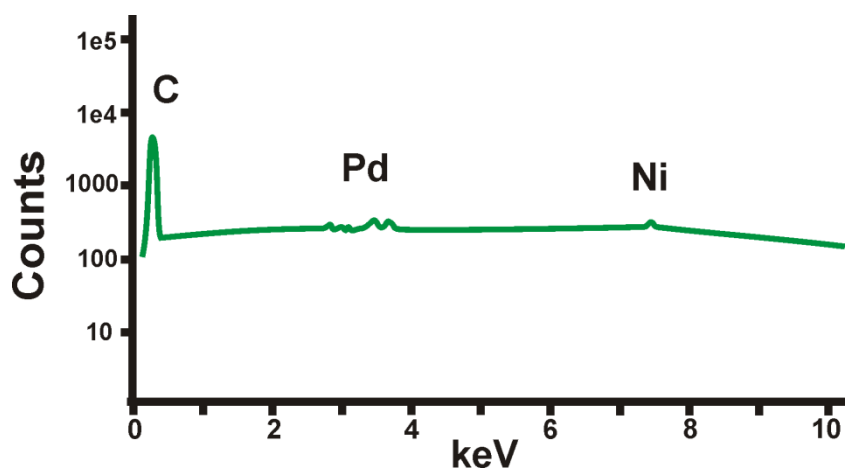

Fig. S4. EDX spectrum of Pd<sub>2</sub>Ni<sub>2</sub>-*p*(MVCA-*co*-St) after background subtraction.

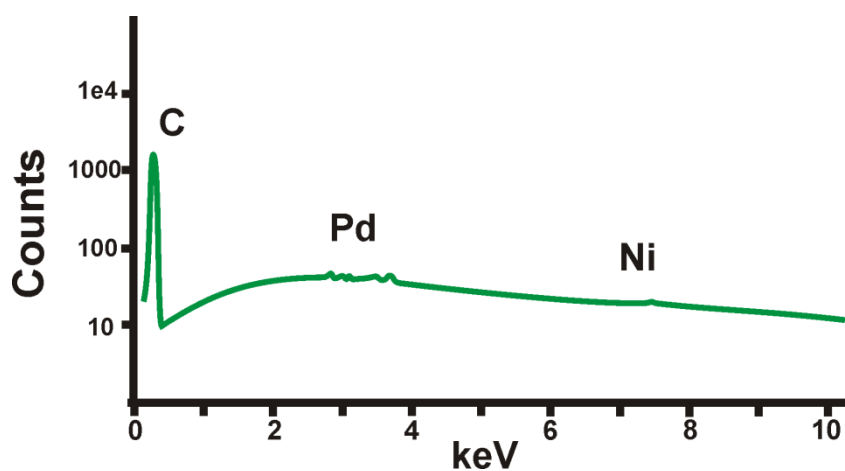

Fig. S5. EDX spectrum of Pd<sub>3</sub>Ni<sub>1</sub>-*p*(MVCA-*co*-St) after background subtraction.

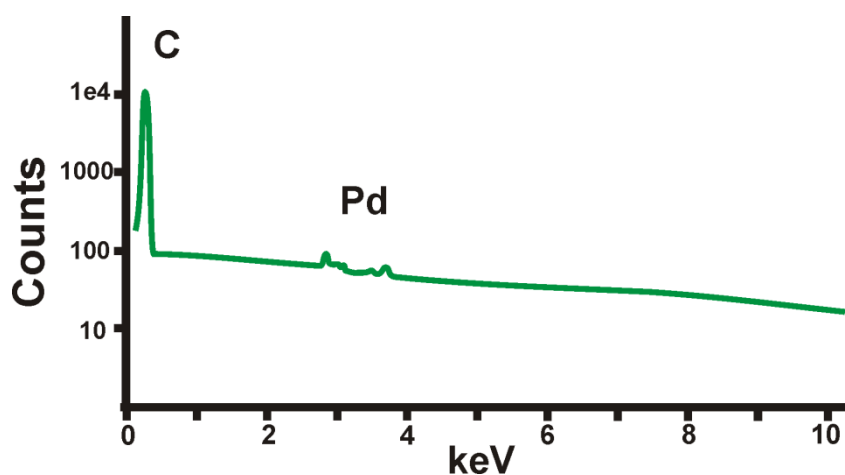

Fig. S6. EDX spectrum of Pd<sub>4</sub>-*p*(MVCA-*co*-St) after background subtraction.

Characteristic lines in the EDX spectra:

Ni lines:  $K\alpha_1 = 7.478$  keV,  $K\alpha_2 = 7.461$  keV (one averaged line is observed);

Pd lines:  $L\alpha_1 = 2.84$  keV,  $L\beta_1 = 2.99$  keV,  $L\beta_3 = 3.07$  keV,  $L\gamma_1 = 3.32$  keV,  $L\gamma_3 = 3.56$  keV
